# Supplementary material for: Analysis and Visualization of Vessels’ RElative MOtion (REMO)
Source: MDPI journal article supplement (doi:10.3390/ijgi12030115), 2023-03-08
Supplement: s1 [file s1]

Archive with 2 entries (2 files):
- Supplementary File S1_Questionnaires.pdf
- Supplementary File S2_Responses.pdf
