# Supplementary material for: Analysis and Visualization of Vessels’ RElative MOtion (REMO)
Source: MDPI journal article supplement (doi:10.3390/ijgi12030115), 2023-03-08
Supplement: s1 [file s1 › Supplementary File S1_Questionnaires.pdf]

**Date:** \_\_\_\_\_

**Start Time:** \_\_\_\_\_

**Location:** \_\_\_\_\_

**Ending Time:** \_\_\_\_\_

Before I begin to ask you questions about the V-REMO, there are several pieces of background information that I would like to collect. As mentioned already, confidentiality will be protected. We can use a false-name for you to keep your identity safe. You can decline to answer any questions.

Do you have any questions before we get started?

## **A. Background Information**

1. Participant's pseudonym:
2. Age:
3. Gender:
4. Race/ethnicity category:
  - a. White
  - b. Black African American, Afro-Caribbean
  - c. American Indian or Alaska Native
  - d. Asian, including Asian Indian, Chinese, Filipino, Japanese, Korean, Vietnamese, and other Asian
  - e. Native Hawaiian, Guamanian or Chamorro, Samoan and other Pacific Islander
  - f. Other: \_\_\_\_\_
5. Education category:
  - a. High School graduate
  - b. College or University graduate
  - c. Graduate School or higher
  - d. Other: \_\_\_\_\_
6. What is the type of your specializations?
7. How long have you worked in your areas of specialty?

8. How frequently do you use PCs in a week?
- a. Less than 1 hour
  - b. 1 to 10 hours
  - c. 10 to 50 hours
  - d. More than 50 hours
  - e. Not sure
9. How many software applications for PCs have you used?
- a. One or two
  - b. Up to five
  - c. More than five
  - d. None
  - e. Not sure
10. Do you feel confused or uncomfortable when using the software applications?
- No 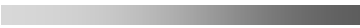 Yes
- a.      b.      c.      d.      e.                      f. Not sure
- 10.1          If you do, could you tell me the reason?

11. Have you used any digital map applications such as Google Maps?
- a. One or two
  - b. Up to five
  - c. More than five
  - d. None
  - e. Not sure

12. Do you feel confused or uncomfortable when using the digital map applications?
- No 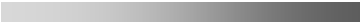 Yes
- a.      b.      c.      d.      e.                      f. Not sure
- 12.1          If you do, could you tell me the reason?

This was the last question for the background information. Before I start asking you questions about the software interface of V-REMO, please let me briefly introduce what I am trying to do in this project. To help you respond to the questions more easily, I would like to show you a pilot software application created for this project that includes an online map and give briefly explain them. If you have any questions, feel free to let me know at any time.

(Demonstration of the pilot version of V-REMO and briefly explain how software works.)

Do you have any questions? If not, please answer the following questions regarding software.

## B. Overall Interface of V-REMO Software

13. After you listen to the demonstration of V-REMO, is the look & feel of its user interface good and easy to understand?

No 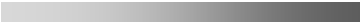 Yes  
a.      b.      c.      d.      e.                  f. Not sure

13.1      If not, could you tell me the reason?

14. Do you feel comfortable using V-REMO?

No 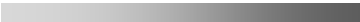 Yes  
a.      b.      c.      d.      e.                  f. Not sure

14.1      If not, could you tell me the reason?

15. Do you find V-REMO easy to use?

No 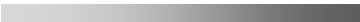 Yes  
a.      b.      c.      d.      e.                  f. Not sure

15.1      Could you tell me the reason?

16. Is V-REMO easy to understand information of vessels?

No 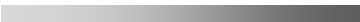 Yes  
a.      b.      c.      d.      e.                  f. Not sure

16.1      If not, could you tell me the reason?

17. Is the digital map in V-REMO easy to aware of the situation of vessels' traffic?

No  Yes  
a.      b.      c.      d.      e.                  f. Not sure

17.1      If not, could you tell me the reason?

18. Are the different types of options in V-REMO easy to understand and use?

No 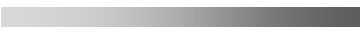 Yes  
a.      b.      c.      d.      e.                      f. Not sure

18.1      If it does, could you tell me the reason?

19. Do you find it easy to query information using V-REMO?

No 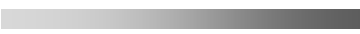 Yes  
a.      b.      c.      d.      e.                      f. Not sure

19.1      If it does, could you tell me the reason?

20. Do you find it easy to understand the results of the query shown in the digital map in V-REMO?

No 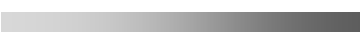 Yes  
a.      b.      c.      d.      e.                      f. Not sure

20.1      If it does, could you tell me the reason?

21. Do the graphics in V-REMO look strange or weird?

No 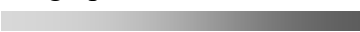 Yes  
a.      b.      c.      d.      e.                      f. Not sure

22.1      If it does, could you tell me the reason?

22. Are the color schemes of the digital map in V-REMO easy to understand?

No 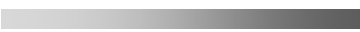 Yes  
a.      b.      c.      d.      e.                      f. Not sure

23.1      If it does, could you tell me the reason?

23. Do you have any comments or ideas how the interface design of V-REMO including shapes, sizes, colors, etc. could be changed to be easier to use?

### C. Conclusion

24. Would V-REMO be helpful to share knowledge or communicate with other people regarding the vessels' movements?

No 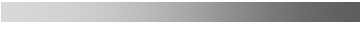 Yes  
a.      b.      c.      d.      e.                      f. Not sure

24.1 If not, could you tell me the reason?

25. Do you have any comments or ideas to make V-REMO more user-friendly?

26. A final question: are there any other points you would like to make?

Thank you very much for your time and participation in this project. I greatly appreciate it. If you have any questions or further comments about what we have discussed, please contact either of us at: 1-(562) 985-7808, [hyowon.ban@csulb.edu](mailto:hyowon.ban@csulb.edu), Hyowon Ban or 82-(42)-866-3114, [hjk@kriso.net](mailto:hjk@kriso.net), Hye-Jin Kim.
