# Supplementary material for: Analysis and Visualization of Vessels’ RElative MOtion (REMO)
Source: MDPI journal article supplement (doi:10.3390/ijgi12030115), 2023-03-08
Supplement: s1 [file s1 › Supplementary File S2_Responses.pdf]

| Item   | Participant 1                                                                                                   | Participant 2                                                                        | Participant 3                                                                                                                                                                                         | Participant 4                                                                                                                                                                                   | Participant 5                                                                                                                                             | Participant 6                                                                                                                                                                                                                                                           |
|--------|-----------------------------------------------------------------------------------------------------------------|--------------------------------------------------------------------------------------|-------------------------------------------------------------------------------------------------------------------------------------------------------------------------------------------------------|-------------------------------------------------------------------------------------------------------------------------------------------------------------------------------------------------|-----------------------------------------------------------------------------------------------------------------------------------------------------------|-------------------------------------------------------------------------------------------------------------------------------------------------------------------------------------------------------------------------------------------------------------------------|
| A-1    | KRISO3                                                                                                          | Brave                                                                                | Leaf                                                                                                                                                                                                  | Sky                                                                                                                                                                                             | Rock                                                                                                                                                      | River                                                                                                                                                                                                                                                                   |
| A-2    | 42                                                                                                              | 31                                                                                   | 27                                                                                                                                                                                                    | 46                                                                                                                                                                                              | 30                                                                                                                                                        | 42                                                                                                                                                                                                                                                                      |
| A-3    | male                                                                                                            | male                                                                                 | male                                                                                                                                                                                                  | male                                                                                                                                                                                            | male                                                                                                                                                      | male                                                                                                                                                                                                                                                                    |
| A-4    | d                                                                                                               | d                                                                                    | d                                                                                                                                                                                                     | d                                                                                                                                                                                               | d                                                                                                                                                         | d                                                                                                                                                                                                                                                                       |
| A-5    | c                                                                                                               | c                                                                                    | c                                                                                                                                                                                                     | c                                                                                                                                                                                               | c                                                                                                                                                         | c                                                                                                                                                                                                                                                                       |
| A-6    | Computer Science, maritime traffic                                                                              | ergonomics                                                                           | e-Navigation                                                                                                                                                                                          | E-navigation                                                                                                                                                                                    | maritime stanards, product specification like IHO, IALA                                                                                                   | research of maritime traffic safety                                                                                                                                                                                                                                     |
| A-7    | 15 years                                                                                                        | 1 year                                                                               | 2 years                                                                                                                                                                                               | 2 years                                                                                                                                                                                         | 4 years                                                                                                                                                   | 18 years                                                                                                                                                                                                                                                                |
| A-8    | d                                                                                                               | d                                                                                    | c                                                                                                                                                                                                     | c                                                                                                                                                                                               | d                                                                                                                                                         | d                                                                                                                                                                                                                                                                       |
| A-9    | c                                                                                                               | a                                                                                    | b                                                                                                                                                                                                     | b                                                                                                                                                                                               | c                                                                                                                                                         | c                                                                                                                                                                                                                                                                       |
| A-10   | b                                                                                                               | c                                                                                    | c                                                                                                                                                                                                     | b                                                                                                                                                                                               | b                                                                                                                                                         | b                                                                                                                                                                                                                                                                       |
| A-10.1 |                                                                                                                 | Because of the use of uncommon symbols, it was difficult to find the functions.      | interface difference, function                                                                                                                                                                        |                                                                                                                                                                                                 |                                                                                                                                                           |                                                                                                                                                                                                                                                                         |
| A-11   | c                                                                                                               | a                                                                                    | b                                                                                                                                                                                                     | c                                                                                                                                                                                               | b                                                                                                                                                         | c                                                                                                                                                                                                                                                                       |
| A-12   | b                                                                                                               | b                                                                                    | b                                                                                                                                                                                                     | b                                                                                                                                                                                               | c                                                                                                                                                         | a                                                                                                                                                                                                                                                                       |
| A-12.1 |                                                                                                                 | Use of uncommon symbols                                                              |                                                                                                                                                                                                       | Zoom in/out and differences from map legend                                                                                                                                                     | The lines are getting thicker, which is very confusing.                                                                                                   |                                                                                                                                                                                                                                                                         |
| B-13   | c                                                                                                               | f                                                                                    | d                                                                                                                                                                                                     | d                                                                                                                                                                                               | d                                                                                                                                                         | d                                                                                                                                                                                                                                                                       |
| B-13.1 | There are some good features but some are not.                                                                  |                                                                                      | Easy to use                                                                                                                                                                                           |                                                                                                                                                                                                 |                                                                                                                                                           |                                                                                                                                                                                                                                                                         |
| B-14   | c                                                                                                               | c                                                                                    | d                                                                                                                                                                                                     | d                                                                                                                                                                                               | d                                                                                                                                                         | d                                                                                                                                                                                                                                                                       |
| B-14.1 | There are some convenient parts but some are not.                                                               |                                                                                      |                                                                                                                                                                                                       | It is easy to use, but it's also limited because you can't specify the color I want.                                                                                                            |                                                                                                                                                           |                                                                                                                                                                                                                                                                         |
| B-15   | d                                                                                                               | d                                                                                    | d                                                                                                                                                                                                     | d                                                                                                                                                                                               | d                                                                                                                                                         | d                                                                                                                                                                                                                                                                       |
| B-15.1 | Mapping for the visualization of attribute values should be done in advance.                                    | Display the vessel trajectories to recognize them easily.                            |                                                                                                                                                                                                       | It is nice that symbols can be expressed in various levels of brightness or thickness of color.                                                                                                 |                                                                                                                                                           |                                                                                                                                                                                                                                                                         |
| B-16   | d                                                                                                               | d                                                                                    | d                                                                                                                                                                                                     | b                                                                                                                                                                                               | b                                                                                                                                                         | b                                                                                                                                                                                                                                                                       |
| B-16.1 | It is good to be able to check additional information with the vessel trajectory.                               |                                                                                      |                                                                                                                                                                                                       | It is not intuitive because the display of brightness or thickness is not clear.                                                                                                                | It is hard to check vessel specification, speed and additional information.                                                                               | Need to display a vessel's information such as ship specification, types, etc.                                                                                                                                                                                          |
| B-17   | d                                                                                                               | b                                                                                    | b                                                                                                                                                                                                     | f                                                                                                                                                                                               | b                                                                                                                                                         | d                                                                                                                                                                                                                                                                       |
| B-17.1 | it is easy to catch information because it is displayed on a familiar electronic chart for me.                  | When the number of vessels increases, it is not easy to identify the vessel symbols. | Since information becomes congested when the number of vessels increases, the user interface needs to be improved.                                                                                    | It is not easy to recognize information that user wants. Although traffic volume and degree of congestion can be analized, it can be difficult to identify the situation of individual vessels. | It seems that v-remo and traffic are not related.                                                                                                         |                                                                                                                                                                                                                                                                         |
| B-18   | d                                                                                                               | f                                                                                    | d                                                                                                                                                                                                     | d                                                                                                                                                                                               | d                                                                                                                                                         | d                                                                                                                                                                                                                                                                       |
| B-18.1 | Overall intuitive. But, I'm not sure about data processing(pre-processing) and I probably don't need to know.   |                                                                                      | Optios are easy to understand. And simple demonstration is usefule to understand overall.                                                                                                             |                                                                                                                                                                                                 |                                                                                                                                                           |                                                                                                                                                                                                                                                                         |
| B-19   | e                                                                                                               | f                                                                                    | c                                                                                                                                                                                                     | c                                                                                                                                                                                               | e                                                                                                                                                         | d                                                                                                                                                                                                                                                                       |
| B-19.1 | The vessel trajectory and additional information can be checked at once.                                        |                                                                                      | It is difficult to find information.                                                                                                                                                                  |                                                                                                                                                                                                 | The user interface for buttons are simple and intuitive.                                                                                                  |                                                                                                                                                                                                                                                                         |
| B-20   | d                                                                                                               | f                                                                                    | d                                                                                                                                                                                                     | c                                                                                                                                                                                               | d                                                                                                                                                         | d                                                                                                                                                                                                                                                                       |
| B-20.1 | Overall intuitive. But, it would be better if the type and specification of the selected ship can be confirmed. |                                                                                      | It is easy to recognize the search results.                                                                                                                                                           |                                                                                                                                                                                                 |                                                                                                                                                           |                                                                                                                                                                                                                                                                         |
| B-21   | b                                                                                                               | f                                                                                    | c                                                                                                                                                                                                     | b                                                                                                                                                                                               | c                                                                                                                                                         | b                                                                                                                                                                                                                                                                       |
| B-21.1 | Nothing wrong.                                                                                                  |                                                                                      | It should be more clearly marked on the basemap to distinguish the size of circle and vessel's speed.                                                                                                 |                                                                                                                                                                                                 | It is suitable.                                                                                                                                           |                                                                                                                                                                                                                                                                         |
| B-22   | e                                                                                                               | f                                                                                    | d                                                                                                                                                                                                     | b                                                                                                                                                                                               | e                                                                                                                                                         | d                                                                                                                                                                                                                                                                       |
| B-22.1 | The color was familiar.                                                                                         |                                                                                      |                                                                                                                                                                                                       | Compared to other software, the pastel tone colors are awkward.                                                                                                                                 |                                                                                                                                                           |                                                                                                                                                                                                                                                                         |
| B-23   | The idea is good. But it is difficult to recognize the shape, size and color changes.                           | When COG is expressed as the size of circle, its meaning can be misunderstood.       | It would be better if the difference between the size and brightness of the circle were more clearly visualized.                                                                                      | Depending on the screen magnification and brightness, it is difficult to distinguish symbols of ships.                                                                                          |                                                                                                                                                           | It is difficult to recognize whether the ship is entering to or leaving from harbour.<br>Display different symbols by types and size of ships.<br>Need functions that can select a shape of symbol and line types, and search trajectories by ship's name or call sign. |
| C-24   | d                                                                                                               | d                                                                                    | d                                                                                                                                                                                                     | e                                                                                                                                                                                               | c                                                                                                                                                         | d                                                                                                                                                                                                                                                                       |
| C-24.1 | The vessel trajectory and additional information can be checked at once.                                        | It is nice to display the vessel trajectories over time.                             |                                                                                                                                                                                                       |                                                                                                                                                                                                 |                                                                                                                                                           |                                                                                                                                                                                                                                                                         |
| C-25   | Need a function to set the color palettes, and make menu items as a group by category.                          | None                                                                                 | It would be better if options or intervals for the time axis could be set. (for example, to be able to search for trajectories from the halfway point to the middle 2/3 point in terms of time range) | It should be improved by reflecting user's requirements, such as grouping multiple menus.                                                                                                       | The symbol of trajectory is not stylish and there are no borders for windows.<br>Information of the selected vessel should be displayed in the MMSI list. | It needs a function for replaying the trajectoty.                                                                                                                                                                                                                       |
| C-26   | It is better to be displayed evenly by interpolating the original data and be able to set the start time.       | None                                                                                 | no need for additional functions.                                                                                                                                                                     |                                                                                                                                                                                                 | To save a GIF file for simulation of vessel trajectories.                                                                                                 |                                                                                                                                                                                                                                                                         |
